# Supplementary material
Source: PubMed Central journal article supplement (PMC4125446)
Supplement: NIHMS609756-supplement-01.pdf [file NIHMS609756-supplement-01.pdf]

Supplemental Table 1: Primer sequences used in PCR reactions

| <b>Gene Name</b> | <b>Forward primer</b>                    | <b>Reverse primer</b>  |
|------------------|------------------------------------------|------------------------|
| Gapdh            | GGGAAGCCCATCACCATCTT                     | GCCTCACCCCATTTGATGTT   |
| Acan             | CCGCTTGCCAGGGGGAGTTG                     | GATGATGGGGCGCACGCCGTA  |
| Col2a1           | ACTGGTAAGTGGGGCAAGAC                     | CCACACCAAATTCCTGTTCA   |
| Cxcl12           | CACTCCGGGCAGGTGCTCAAAC                   | AGACCACCCTGGCCTTCATGGG |
| Cxcr4            | TGAGGCGTTTGGTGCTCCGG                     | GGTGCAGCCGGTACTTGTCCG  |
| Dll4             | GCCCGCTCGAGACCCTAGGATT                   | AGGCGTCATCCCTTGGGGTGT  |
| Gsc              | CCAGCAGTGCTCCTGCGTCC                     | CGACAGCGTGCCACGTTCA    |
| Hey1             | CTGCCCCAGAATGGCCACGG                     | GGTCACCACGGGAAGCACCG   |
| Mepe             | TGCTGCCCTCCTCAGAAATATC                   | GTTCGGCCCCAGTCACTAGA   |
| Mgp              | TCCCCTCAGCAGAGGTGGCG                     | ATTTGGCTCCTCGGCGCTGC   |
| Mmp13            | TTCTGGCGCCTGCACCCTCA                     | GTGAACCGCAGCGCTCAGTC   |
| Osteopontin/Spp1 | CCTTGCGCCACAGAATGCTGT                    | CGGCCGTTGGGGACATCGAC   |
| Ror2             | ACTCATCAGCCAGCACAAAC                     | GTCCTCCATGAACCTCACT    |
| Slit2            | GGGAACCGCGAGTGCCGAAA                     | AGCCAACAGCGACGTCTGC    |
| Sox5             | GGCCCACTCCAGCTGCAGGATGAA                 | GACAGAGGCTTTGAGGGGGCCA |
| Sox9             | AGGAAGCTGGCAGACCAGTA                     | CGTTCCTCACC GACTTCCTC  |
| Tie2/Tek         | CATGCGAGCGGGAAGTCGCA                     | ATGGGCTCATGGGGGTGCCA   |
| Vdr              | AAGCCAGCCTCCCAGCAGGA                     | AGGCACTGGCAGGGGAAGGG   |
| Wwp2             | GCGAGGGCGTGCGGTACTTT                     | GCGGCGCAGGTTCGTAAGGTT  |
| <b>miR Name</b>  | <b>Applied Biosystems catalog number</b> |                        |
| snoRNA-202       | 1232                                     |                        |
| miR-503          | 2456                                     |                        |
| miR-376c         | 2450                                     |                        |
| miR-218          | 521                                      |                        |
| miR-669d         | 2808                                     |                        |
| miR-200c         | 2300                                     |                        |
| miR-140          | 1187                                     |                        |
| miR-124a         | 1182                                     |                        |

Supplemental Table 2: Trabecular bone architecture in the distal femoral metaphysis of 4- and 24-week old mice.

| <b>Age</b> | <b>Genotype</b>                                | <b>n</b> | <b>BV/TV</b>  | <b>Tb.N (1/mm)</b> | <b>Tb.Th (mm)</b> | <b>Tb.Sp (mm)</b> |
|------------|------------------------------------------------|----------|---------------|--------------------|-------------------|-------------------|
| 4 wks      | WT                                             | 5        | 0.142 (0.043) | 5.72 (0.83)        | 0.034 (0.003)     | 0.182 (0.025)     |
|            | Runx2 <sup>+/-</sup>                           | 5        | 0.140 (0.012) | 6.23 (0.12)        | 0.032 (0.001)     | 0.163 (0.003)     |
|            | Axin2 <sup>-/-</sup> ;<br>Runx2 <sup>+/-</sup> | 6        | 0.140 (0.051) | 6.06 (1.43)        | 0.032 (0.001)     | 0.179 (0.042)     |
|            | Axin2 <sup>-/-</sup>                           | 4        | 0.154 (0.028) | 6.51 (0.53)        | 0.032 (0.003)     | 0.159 (0.014)     |
| 24 wks     | WT                                             | 3        | 0.134 (0.020) | 3.85 (0.37)        | 0.051 (0.006)     | 0.260 (0.024)     |
|            | Runx2 <sup>+/-</sup>                           | 3        | 0.140 (0.029) | 4.47 (0.57)        | 0.044 (0.016)     | 0.224 (0.035)     |
|            | Axin2 <sup>-/-</sup> ;<br>Runx2 <sup>+/-</sup> | 2        | 0.070 (0.039) | 3.60 (0.89)        | 0.037 (0.001)     | 0.284 (0.074)     |
|            | Axin2 <sup>-/-</sup>                           | 2        | 0.122 (0.019) | 3.70 (0.47)        | 0.041 (0.006)     | 0.276 (0.041)     |
